# Supplementary material for: Hydroxylated derivatives of dimethoxy-1,4-benzoquinone as redox switchable earth-alkaline metal ligands and radical scavengers
Source: PubMed Central journal article supplement — Sci Rep. 2013 May 21;3:1865. doi: 10.1038/srep01865 (PMC3659321; doi:10.1038/srep01865), 2013-05-21
Supplement: srep01865-s1.pdf [file srep01865-s1.pdf]

**Supplementary Information for:**

**Hydroxylated derivatives of dimethoxy-1,4-benzoquinone as redox switchable earth-alkaline metal ligands and radical scavengers**

Rubin Gulaboski<sup>1,3,4</sup>, Ivan Bogeski<sup>1,4,\*</sup>, Valentin Mirčeski<sup>2</sup>, Stephanie Saul<sup>1</sup>, Bastian Pasička<sup>1</sup>, Haleh H. Haeri<sup>1</sup>, Marina Stefova<sup>2</sup>, Jasmina Petreska Stanoeva<sup>2</sup>, Saša Mitrev<sup>3</sup>, Markus Hoth<sup>1</sup>, Reinhard Kappl<sup>1,\*</sup>

<sup>1</sup> Department of Biophysics, School of Medicine, Saarland University, 66421 Homburg, Germany

<sup>2</sup> Institute of Chemistry, Faculty of Natural Sciences and Mathematics, "SS Cyril and Methodius" University, PO Box 162, 1000, Skopje, Republic of Macedonia

<sup>3</sup> University Goce Delčev, Stip, Republic of Macedonia

<sup>4</sup> Contributed equally

\* To whom correspondence should be addressed:

Ivan Bogeski, e-mail: [ivan.bogeski@uks.eu](mailto:ivan.bogeski@uks.eu); Tel.: +49 6841 16-26452 Fax: +49 6841 16-26060

Reinhard Kappl, e-mail: [reinhard.kappl@uks.eu](mailto:reinhard.kappl@uks.eu); Tel.: +49 6841 16-26221 Fax: +49 6841 16-26060

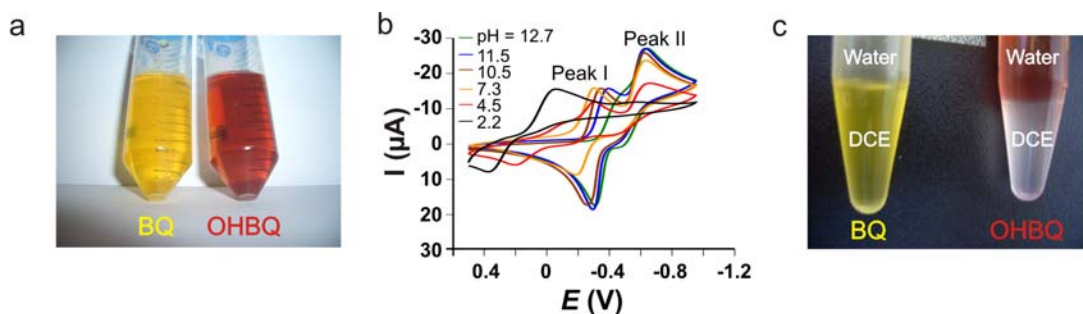

Figure S1: a) Color of 1 mM BQ dissolved in 0.5 M NaCl, pH = 7 (left); and color of 1 mM BQ initially reacted in 0.1 M NaOH for 90 min and afterwards titrated to pH of 7 (right). b) CVs of the reaction mixture recorded after incubation of 100  $\mu\text{M}$  BQ in 0.1 M NaOH for 1h followed by titration of the solution with HCl to required pH. c) Partition of native BQ between water and 1,2-dichloroethane (DCE) (left), and partition between water solution and DCE of the reaction mixture of BQ initially dissolved in 0.1 M NaOH for 90 min and afterwards titrated to pH of 7 (right). DCE is a lipophilic (water immiscible solvent) with higher density than water.

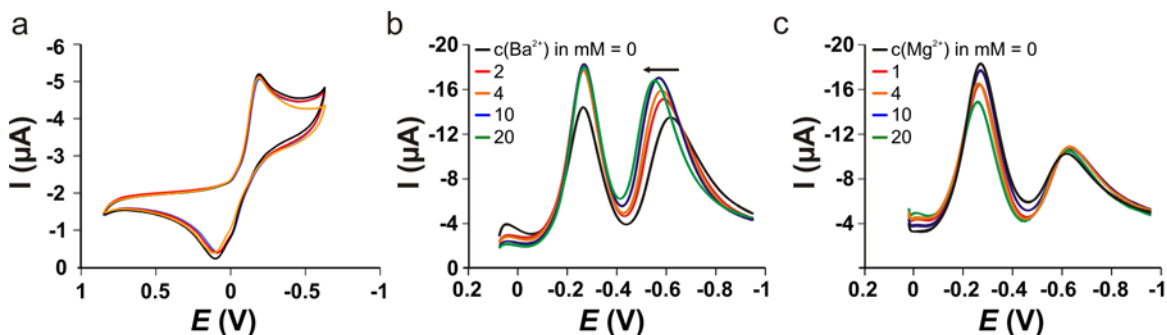

Figure S2: Chelating properties of BQ and OHBQ towards  $\text{Ca}^{2+}$ ,  $\text{Ba}^{2+}$  and  $\text{Mg}^{2+}$   
 a) CV of BQ showing its insensitivity towards  $\text{Ca}^{2+}$  ions in the aqueous solution.  $c(\text{Ca}^{2+})/\text{mM} = 0, 2; 10$  and  $50$ ,  $c(\text{BQ}) = 100 \mu\text{M}$ ,  $v = 30 \text{ mV/s}$ . Net SWV depicting the complexing abilities of BQR towards  $\text{Ba}^{2+}$  (b) and  $\text{Mg}^{2+}$  (c). BQ was initially kept in contact with 0.1 M NaOH for 1 h; pH was adjusted to 7 afterwards.
